# Supplementary material for: Promoting the oxygen reduction reaction with gold at step/edge sites of Ni@AuPt core–shell nanoparticles
Source: Royal Society of Chemistry journal article supplement (doi:10.1039/c6cy02344d), 2017-01-01
Supplement: c6cy02344d1.pdf [file c6cy02344d1.pdf]

## Supporting Information

### Promoting Oxygen Reduction Reaction by Gold at Step/Edge Sites of Ni@AuPt Core-Shell Nanoparticles

Hao Wang, Wei An\*

College of Chemistry and Chemical Engineering, Shanghai University of Engineering Science, Songjiang District, Shanghai 201620, China.

\*E-mail: weian@sues.edu.cn

**Table S1.** Energy ordering for one Ni or Au atom exchanged to different location on Ni/Au<sub>1</sub>Pt<sub>3</sub>(221) surface.

|                 |    | Ni@edge                                                                             | Au@terrace                                                                           | Ni@terrace                                                                            | Ni/Au <sub>1</sub> Pt <sub>3</sub> (221) |
|-----------------|-------------------------------------------------------------------------------------|-------------------------------------------------------------------------------------|--------------------------------------------------------------------------------------|---------------------------------------------------------------------------------------|------------------------------------------|
|                 | Au Ni Pt                                                                            |                                                                                     |                                                                                      |                                                                                       |                                          |
| $\Delta E$ (eV) |                                                                                     | 0.75                                                                                | 0.42                                                                                 | 0.39                                                                                  | 0                                        |
| Side-view       |  |  |  |  |                                          |
| Top-view        |  |  |  |  |                                          |

**Table S2.** Calculated binding energy (BE, in eV) for various ORR intermediates at different adsorption sites. (a) Pt(111) and Ni/Pt(111) facets, (b) Pt(221), Ni/Pt(221) and Ni/Au<sub>1</sub>Pt<sub>3</sub>(221) facets. BEs in bold denote the most favorable adsorption sites.

| (a)        |             |      |             |                  |        |  |
|------------|-------------|------|-------------|------------------|--------|--|
| Surface    | O*          |      | OH*         |                  | OOH*   |  |
|            | fcc         | hcp  | bridge      | top              | bridge |  |
| Pt(111)    | <b>1.29</b> | 1.66 | <b>0.72</b> | 0.79             | 3.77   |  |
| Ni/Pt(111) | <b>1.82</b> | 2.02 | <b>1.09</b> | ttb <sup>a</sup> | 3.81   |  |

  

| (b)                                         |       |             |      |             |                   |             |
|---------------------------------------------|-------|-------------|------|-------------|-------------------|-------------|
| Surface                                     | Site  | BE-O*       | Site | BE-OH*      | Site              | BE-OOH*     |
| Pt<br>(221)                                 | EU(h) | <b>1.25</b> | E(b) | <b>0.45</b> | E(b) <sup>b</sup> | 2.63        |
|                                             | UM(h) | 1.64        | U(b) | 1.12        | E(b)              | <b>3.30</b> |
|                                             | ML(h) | 1.69        | M(b) | 1.05        | U(b)              | 3.98        |
|                                             | LE(h) | 1.62        |      |             | M(b)              | 3.96        |
| Ni/Pt<br>(221)                              | EU(h) | <b>1.44</b> | E(b) | <b>0.53</b> | E(b)              | <b>3.57</b> |
|                                             | UM(h) | 2.05        | U(b) | 1.32        | U(b)              | 4.21        |
|                                             | ML(h) | 2.25        | M(b) | 1.26        | M(b)              | 4.18        |
|                                             | LE(h) | 1.62        |      |             |                   |             |
| Ni/Au <sub>1</sub> Pt <sub>3</sub><br>(221) | EU(h) | 2.25        | E(b) | 1.20        | E(b)              | 4.23        |
|                                             | UM(h) | <b>1.96</b> | U(b) | <b>1.07</b> | U(b)              | <b>4.14</b> |
|                                             | ML(h) | 2.21        | M(b) | 1.18        | M(b)              | 4.14        |
|                                             | LE(h) | 2.43        |      |             |                   |             |

<sup>a</sup> ttb=top-to-bridge.

<sup>b</sup>The O-O cleavage OOH\* → O\*+OH\* occurs during optimization.

**Table S3.** Calculated Bader charge (in  $e^-$ ) for surface Pt atoms at E, U, M, L positions on Pt(221), Ni/Pt(221), and Ni/Au<sub>1</sub>Pt<sub>3</sub>(221) surfaces.

| Site                                     | E                  | U     | M     | L     |
|------------------------------------------|--------------------|-------|-------|-------|
| Pt(221)                                  | -0.06              | -0.02 | -0.01 | -0.02 |
| Ni/Pt(221)                               | -0.15              | -0.15 | -0.18 | -0.27 |
| Ni/Au <sub>1</sub> Pt <sub>3</sub> (221) | -0.08 <sup>a</sup> | -0.20 | -0.16 | -0.29 |

<sup>a</sup> Calculated Bader charge of Au atoms.

**Table S4.** Correlation between calculated BE-O and d-band center at various surface sites.

| Cat                                            | BE-O<br>(eV) | d-band center<br>(eV) |
|------------------------------------------------|--------------|-----------------------|
| Pt(111)(T) <sup>a</sup>                        | 1.29         | -2.35                 |
| Ni/Pt(111)(T)                                  | 1.82         | -2.55                 |
| Pt(221)(S) <sup>b</sup>                        | 1.64         | -2.44                 |
| Pt(221)(E) <sup>c</sup>                        | 1.25         | -2.29                 |
| Ni/Pt(221)(S)                                  | 2.05         | -2.67                 |
| Ni/Pt(221)(E)                                  | 1.44         | -2.36                 |
| <b>Ni/Au<sub>1</sub>Pt<sub>3</sub>(221)(S)</b> | <b>1.96</b>  | <b>-2.51</b>          |
| <b>Ni/Au<sub>1</sub>Pt<sub>3</sub>(221)(E)</b> | <b>2.25</b>  | <b>-3.17</b>          |

<sup>a</sup>T=terrace site;

<sup>b</sup>S=step site;

<sup>c</sup>E=edge site.

**Table S5.** Calculated binding energy (BE, in eV) and O-O bond length (BL, in Å) for O<sub>2</sub> adsorbed at various sites.

| Surface                                  | Step/BL     | Edge/BL    |
|------------------------------------------|-------------|------------|
| Pt(111)                                  | -0.87/ 1.38 | \          |
| Ni/Pt(111)                               | -0.41/1.35  | \          |
| Pt(221)                                  | -0.57/1.38  | -1.20/1.38 |
| Ni/Pt(221)                               | -0.19/1.35  | -0.34/1.37 |
| Ni/Au <sub>1</sub> Pt <sub>3</sub> (221) | -0.13/1.35  | -0.19/1.35 |

**Table S6.** Calculated activation energies (E<sub>a</sub>, in eV), reaction energy (ΔE, in eV) and imaginary frequency (i-freq, in cm<sup>-1</sup>) of transition state for O<sub>2</sub> dissociation and the first protonation reaction.

| Surface                                     | *O <sub>2</sub> → *O+*O   | *H+*O → *OH               |
|---------------------------------------------|---------------------------|---------------------------|
|                                             | E <sub>a</sub> /ΔE/i-freq | E <sub>a</sub> /ΔE/i-freq |
| Pt(111)                                     | 0.77/-0.87/123            | 1.00/-0.12/607            |
| Ni/Pt(111)                                  | 0.98/-0.65/319            | 0.78/-0.59/261            |
| Pt(221)(S)                                  | 0.73/-1.26/283            | 0.94/-0.23/167            |
| Pt(221)(E)                                  | \                         | 1.01/-0.11/468            |
| Ni/Pt(221)(S)                               | 0.95/-0.76/376            | 0.72/-0.54/235            |
| Ni/Pt(221)(E)                               | \                         | 0.90/-0.40/354            |
| Ni/Au <sub>1</sub> Pt <sub>3</sub> (221)(S) | 1.07/-0.63/388            | 0.78/-0.67/265            |
| Ni/Au <sub>1</sub> Pt <sub>3</sub> (221)(E) | 1.14/-0.58/120            | 0.56/-1.01/175            |

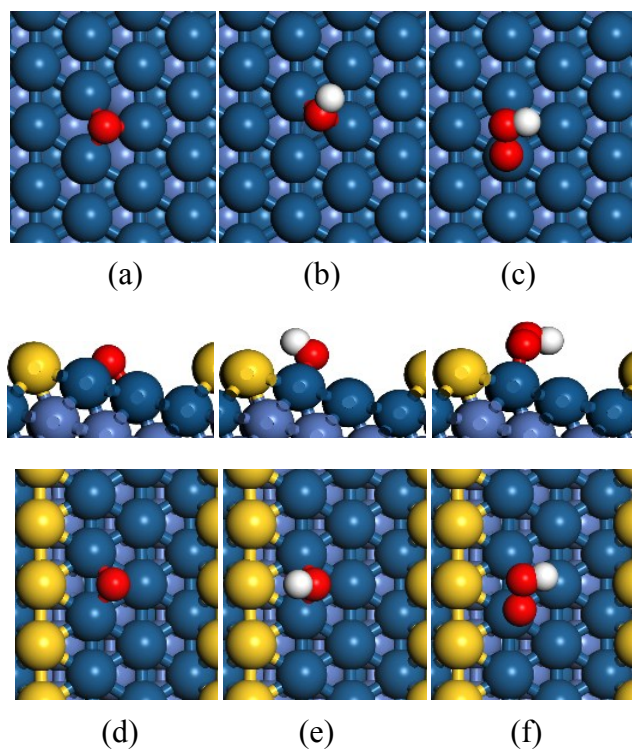

**Fig. S1.** (a)-(c) Most stable configuration for the adsorbates on Ni/Pt(111) facet (a) O\* at fcc site, (b) OH\* at bridge site, (c) OOH\* at bridge site. (d)-(f) Most stable configuration for the adsorbates on Ni/Au<sub>1</sub>Pt<sub>3</sub>(221) facet (d) O\* at EU(h) site, (e) OH\* at M(b) site, (f) OOH\* at M(b) site.

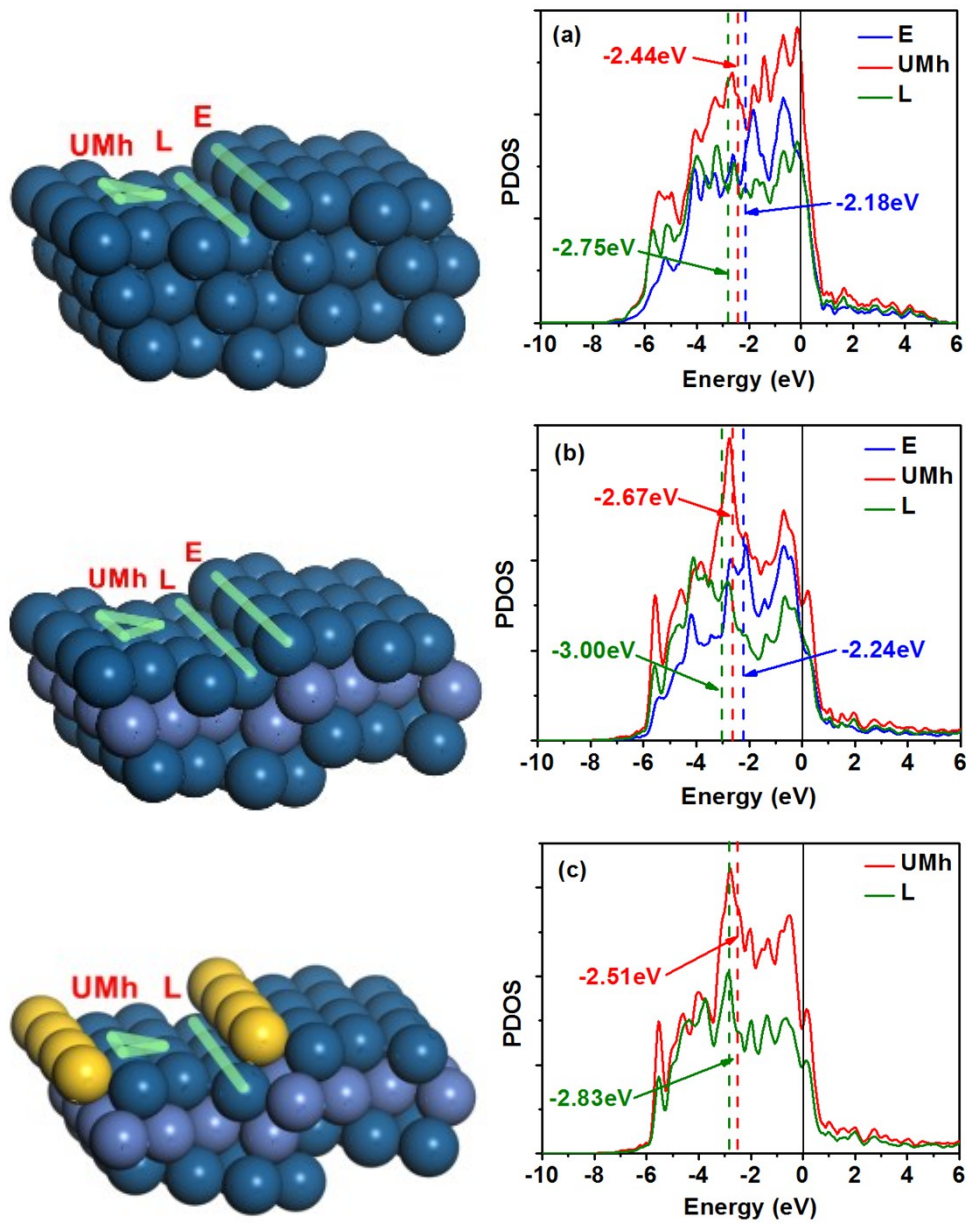

**Fig. S2.** Calculated 5d-PDOS and d-band center of surface Pt atoms at E, UMh, and L sites (CN=7, 9, and 11, respectively). (a) Pt(221), (b) Ni/Pt(221), and (c) Ni/Au<sub>1</sub>Pt<sub>3</sub>(221). PDOS is drawn by using 2, 3, and 2 surface Pt atoms, respectively.
